# Supplementary material for: Cognition and action: a latent variable approach to study contributions of executive functions to motor control in older adults
Source: publisher site journal article supplement (doi:10.18632/aging.203239), 2021-06-24
Supplement: Supplementary file [file aging-v13i12-203239-supplementary-material-SD2.pdf]

## SUPPLEMENTARY FIGURES

### Session 1

- general information & informed consent
- Montreal Cognitive Assessment
- Peabody Picture Vocabulary Test
- Brief Symptom Inventory-18
- questionnaires
- neuropsychological testing I
  - stop-signal task (inhibition)
  - category-switch task (shifting)
  - digit-span task (updating)
- familiarization and practice motor task

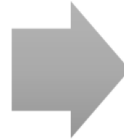

### Session 2

- neuropsychological testing II
  - color-shape task (shifting)
  - keep track task (updating)
  - antisaccade task (inhibition)
  - spatial 2-back task (updating)
  - number-Stroop task (inhibition)
  - number-letter task (shifting)
- motor task

Supplementary Figure 1. Description of the study protocol.

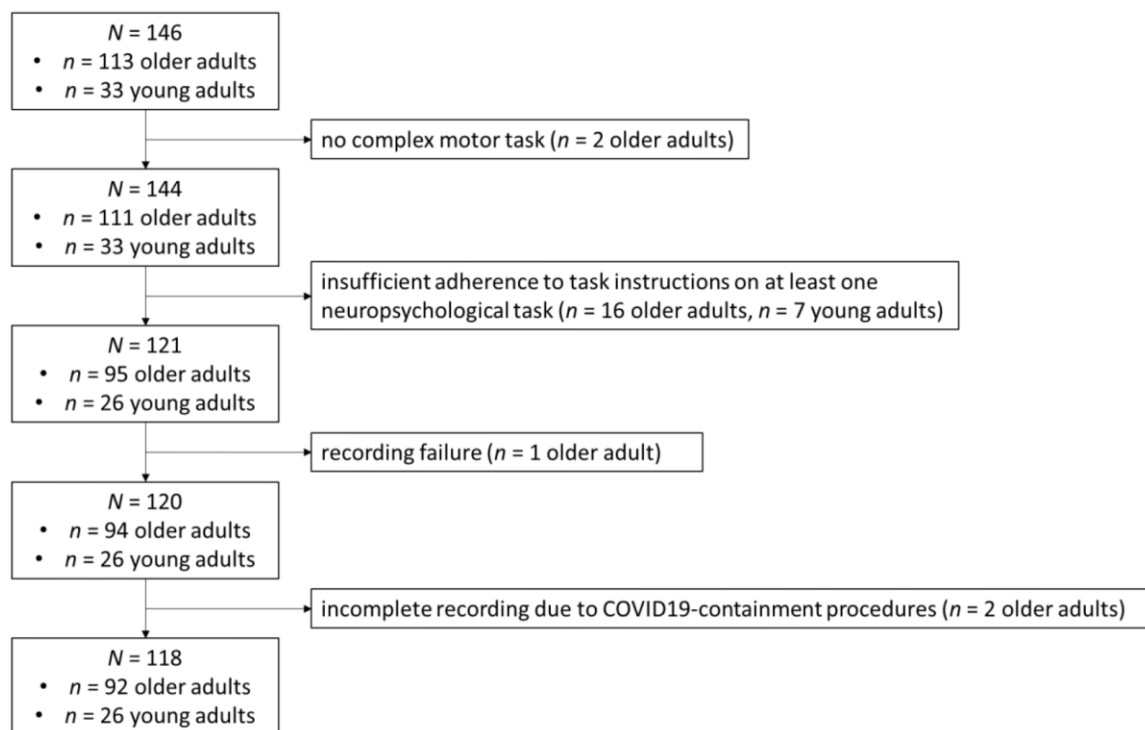

Supplementary Figure 2. Flow-chart describing the selection of the sample for the current analyses.
